# Supplementary figures and images for: Peptidoglycan sensing by octopaminergic neurons modulates Drosophila oviposition
Source: eLife journal article supplement (doi:10.7554/elife.21937), 2017-03-06

**A**

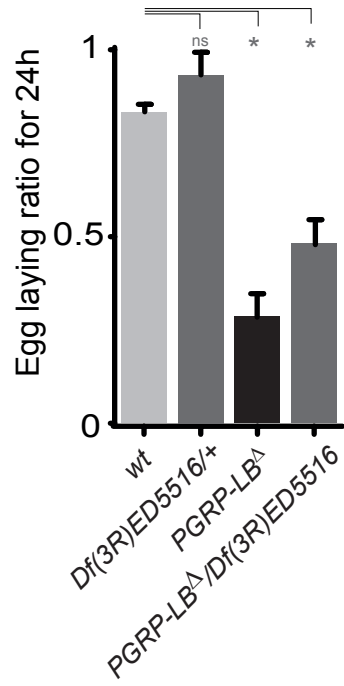

**B**

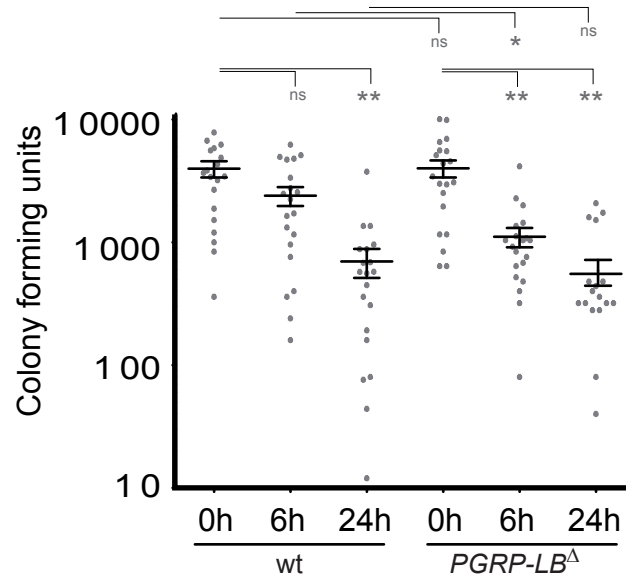

**C**

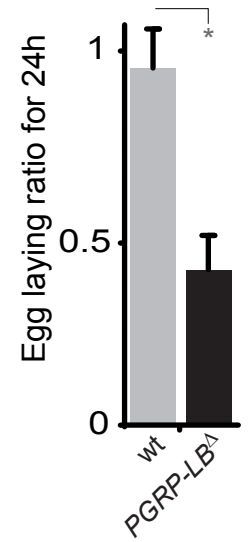

**D**

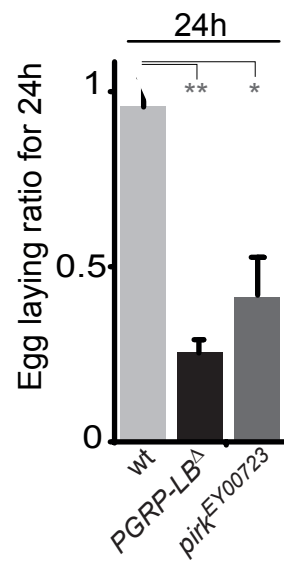

Supplement: supp [file elife-21937-supp-v1.zip]

A

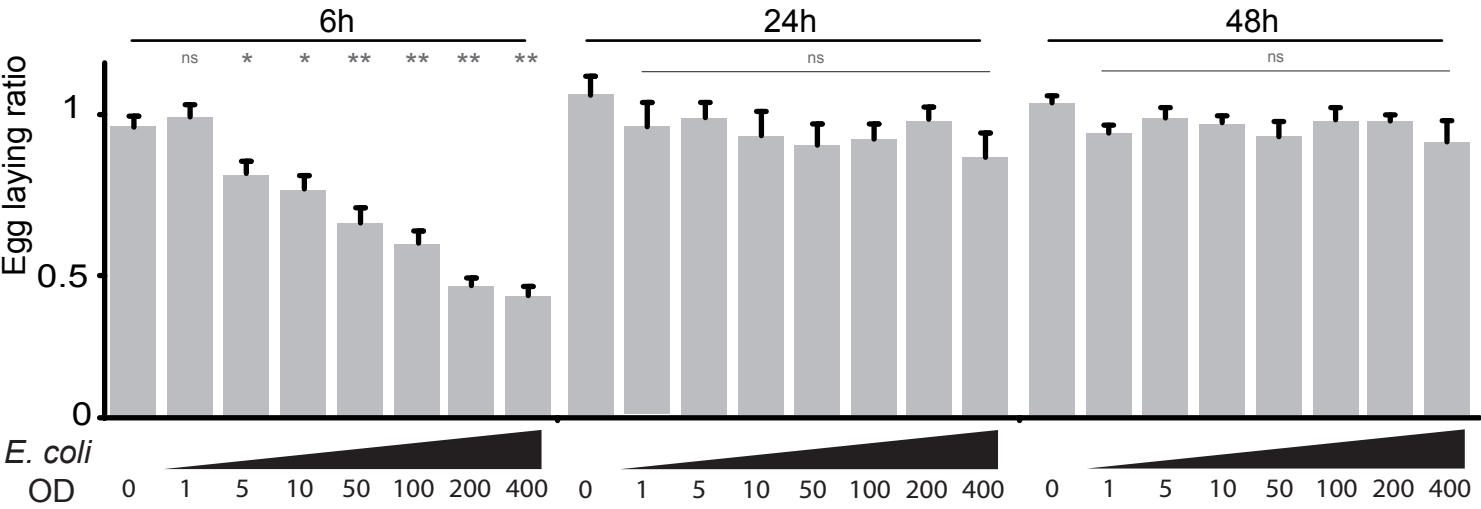

B

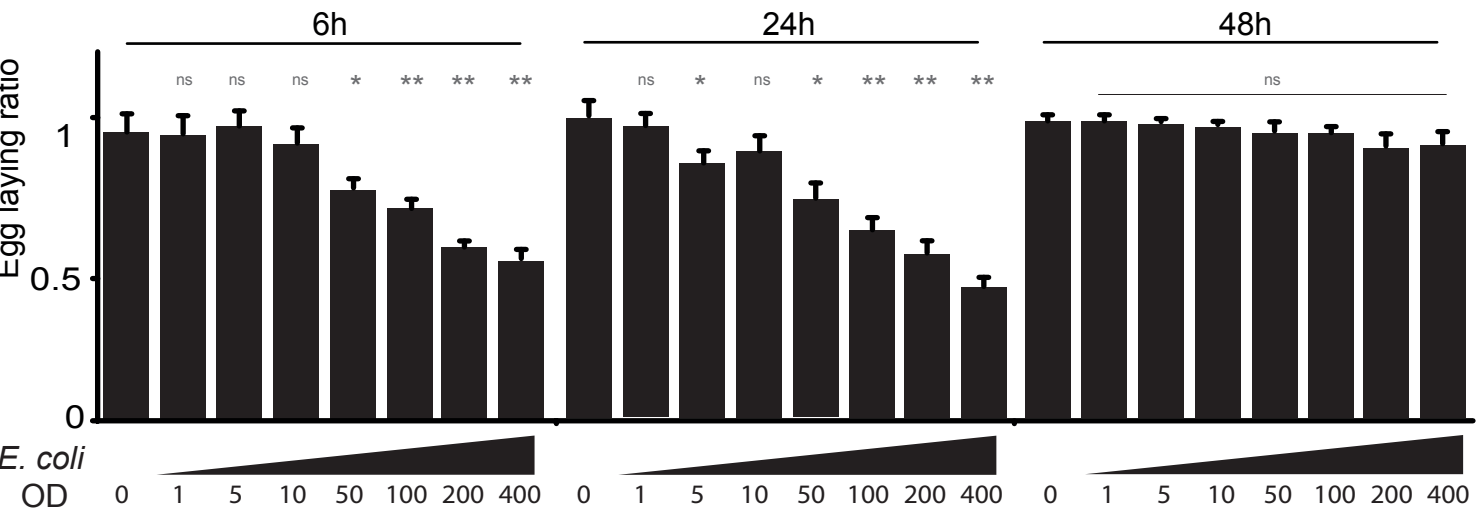

Supplement: supp [file elife-21937-supp-v1.zip]

**A**

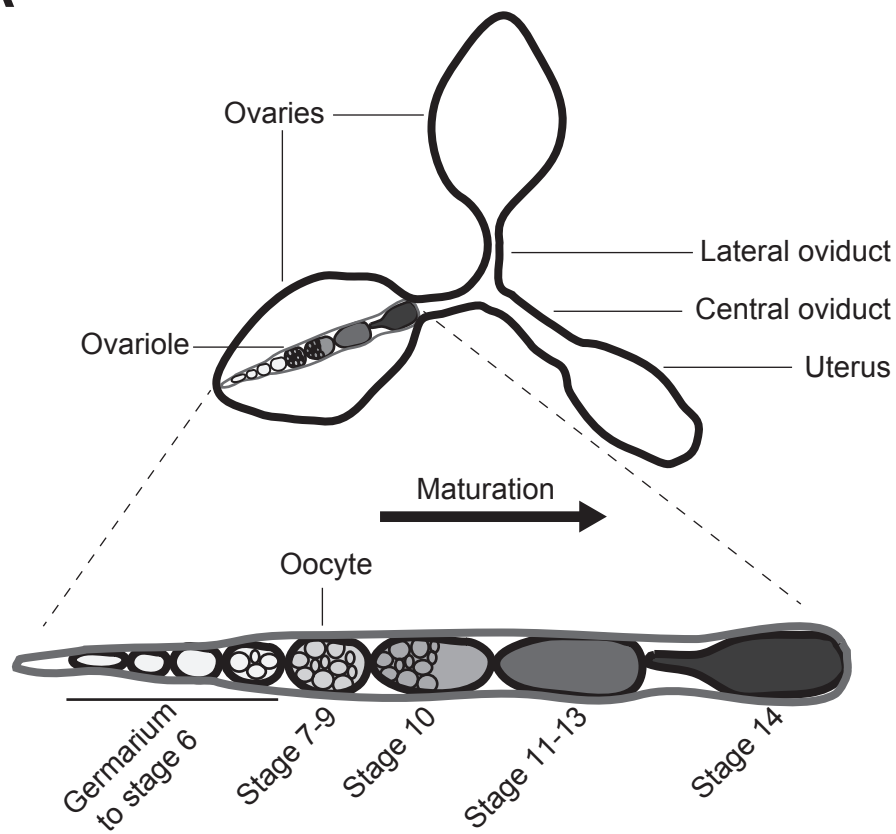

**B**

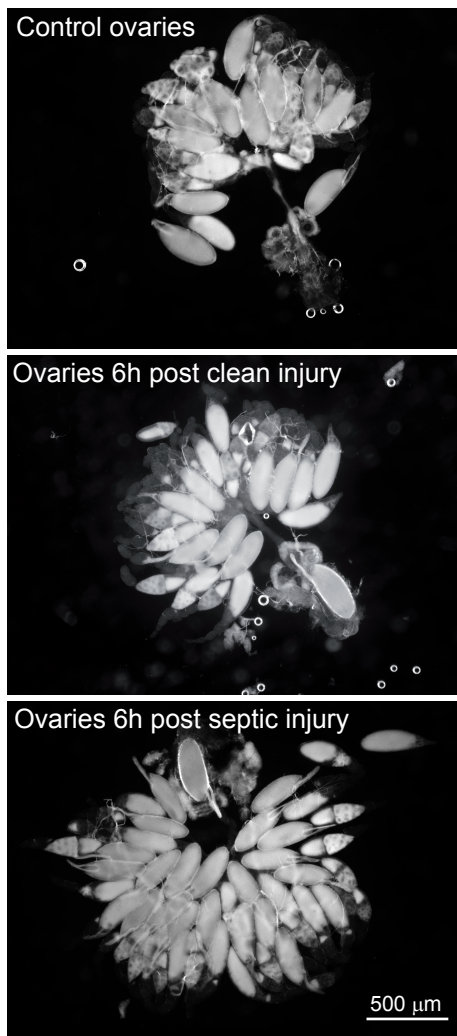

**C**

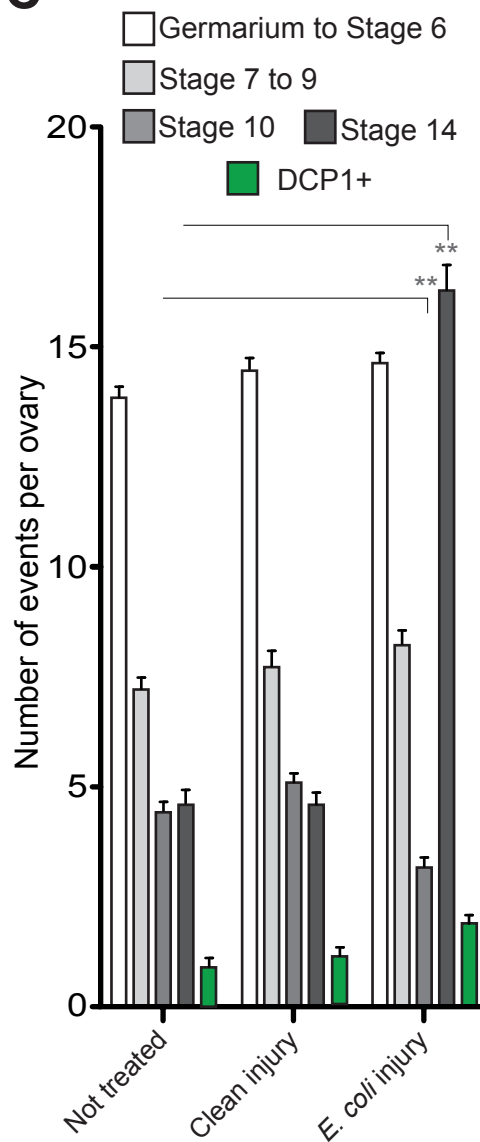

**D**

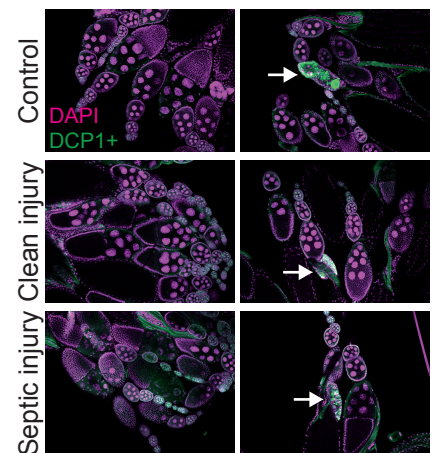

**E**

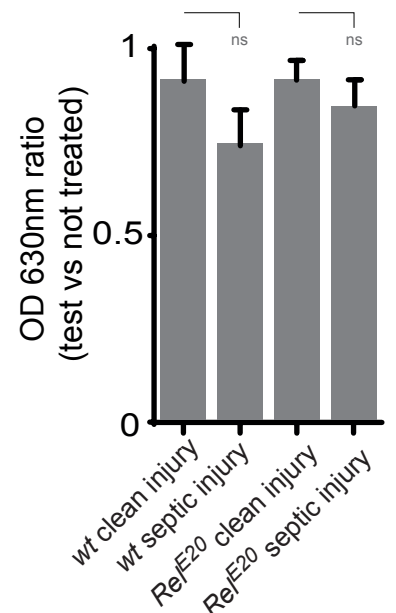

Supplement: supp [file elife-21937-supp-v1.zip]

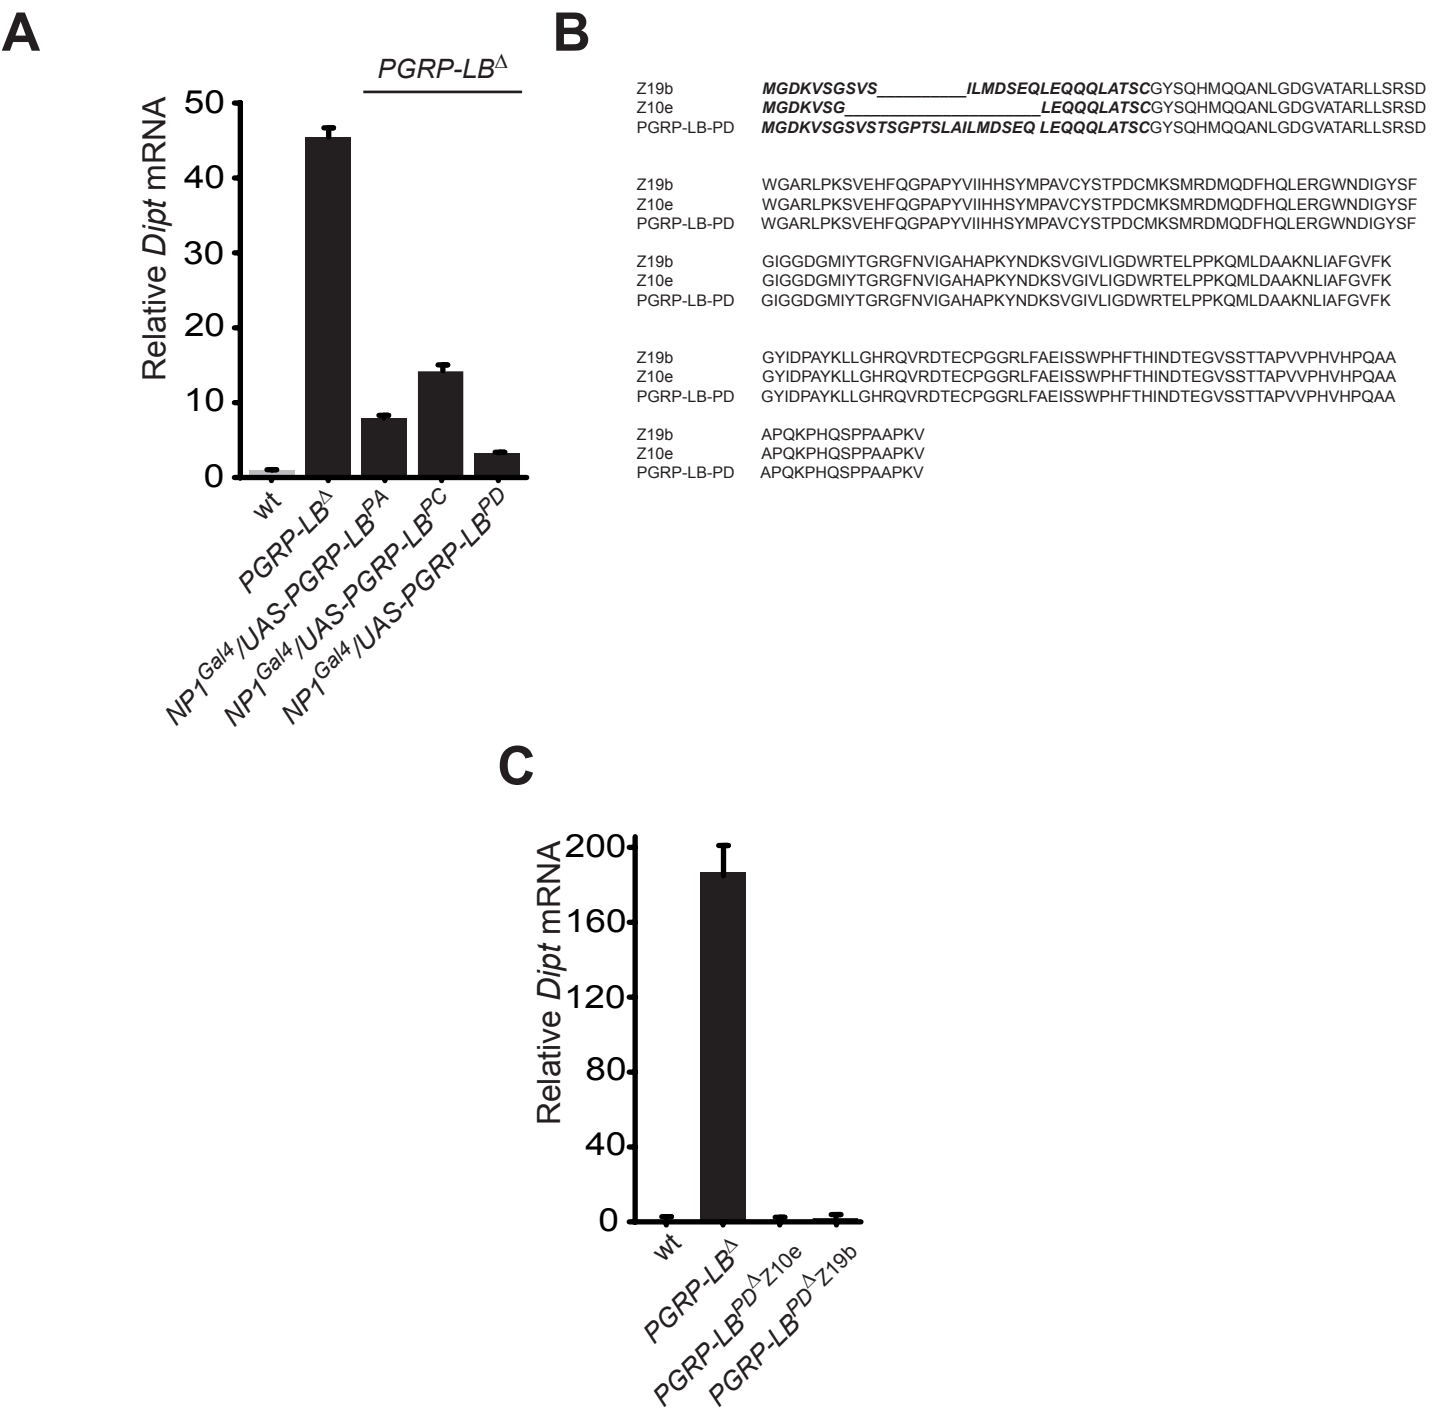

Supplement: supp [file elife-21937-supp-v1.zip]

**A**

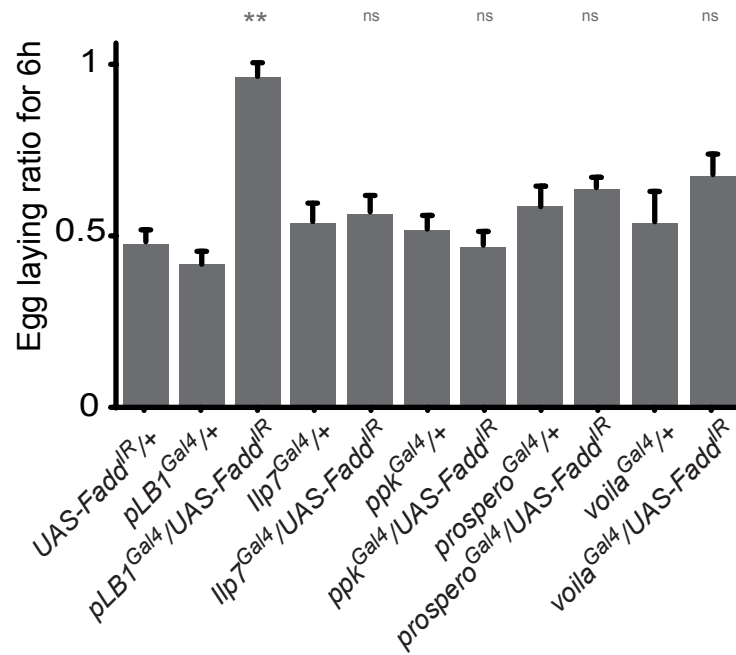

**B**

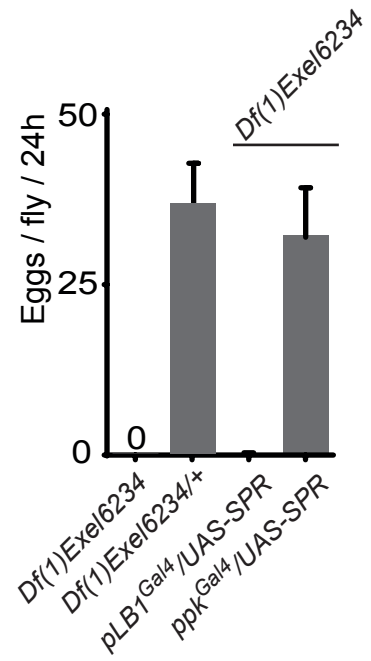

Supplement: supp [file elife-21937-supp-v1.zip]

**A**

Abdomens containing ovaries

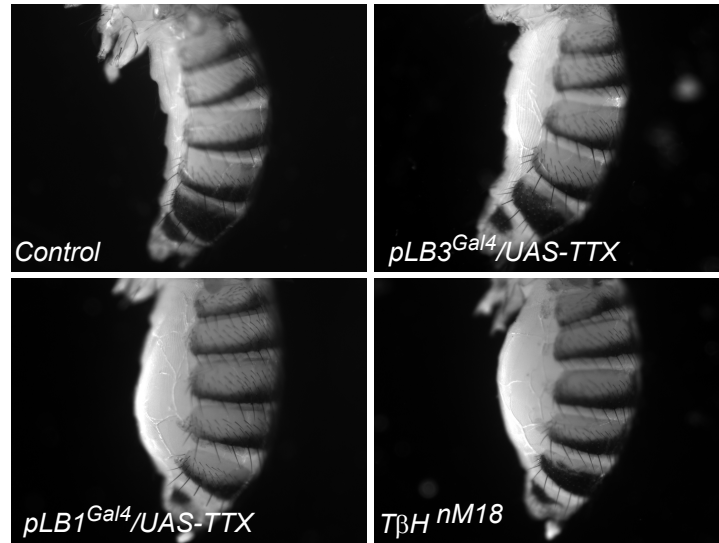

**B**

Ovaries

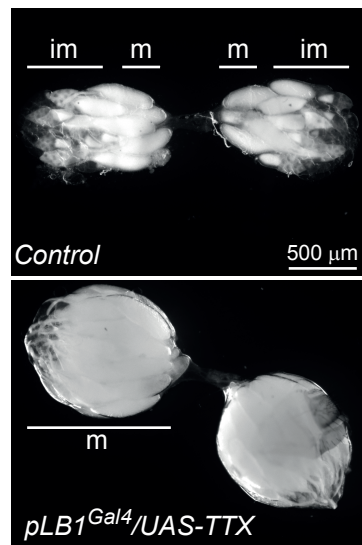

**C**

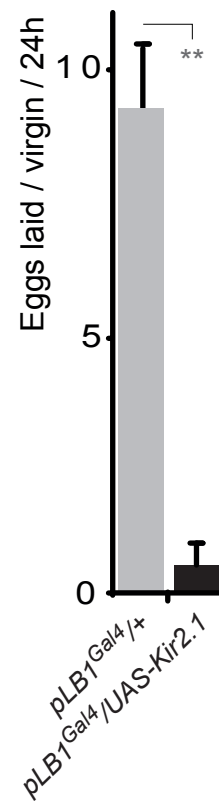

Supplement: supp [file elife-21937-supp-v1.zip]
